# Supplementary material
Source: PubMed Central journal article supplement (PMC4108264)
Supplement: NIHMS595563-supplement-supplemental_material.pdf [file NIHMS595563-supplement-supplemental_material.pdf]

**Figure legend:**

**Supplement Figure I. Recombinant S100A12 protein does not induce FGF23 mRNA in cultured neonatal cardiac fibroblasts.** Neonatal cardiac fibroblasts were cultured for 14 and 20 days in either control medium (DMEM) or high phosphate calcification medium supplemented with either rS100A12 protein (1 $\mu$ g/ml) or control (bovine serum albumin, BSA). **A)** FGF23 mRNA was similar in all groups. **B)** mRNA for Bone Gla Protein (BGLAP, osteocalcin) increased in response to 14-day-calcification medium, but S100A12 had no effect on BGLAP. **C)** mRNA for OPN (osteopontin) increased in response to 14-day and 20-day treatment with calcification medium, and was significantly attenuated in S100A12-treated cells. **D)** mRNA for Matrix Gla Protein (MGP) increased in response to 14-day and 20-day treatment with calcification medium, but S100A12 had no effect on MGP.

**Supplement TABLE I.** Expression fold change of the top 50 genes significantly up and down regulated in blood cDNA isolated from 6-weeks old hBAC-S100 mice and WT littermate mice and analyzed on IlluminaWG-6v2 microarray.

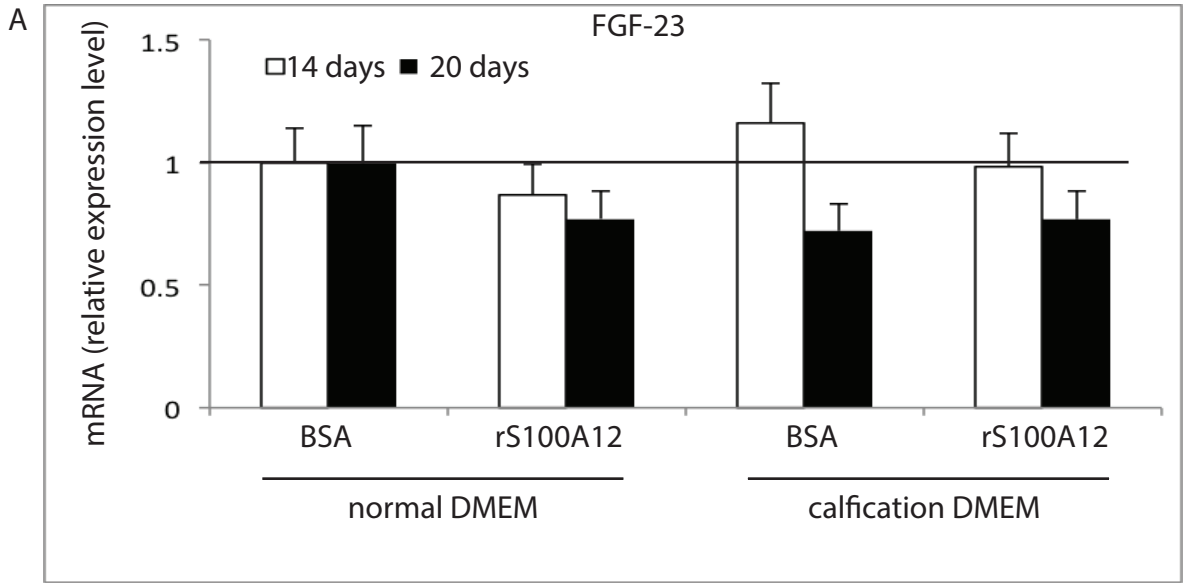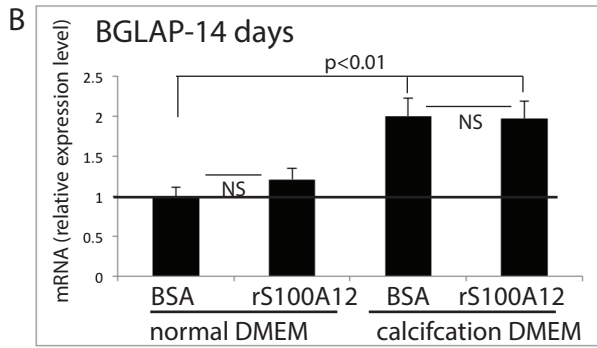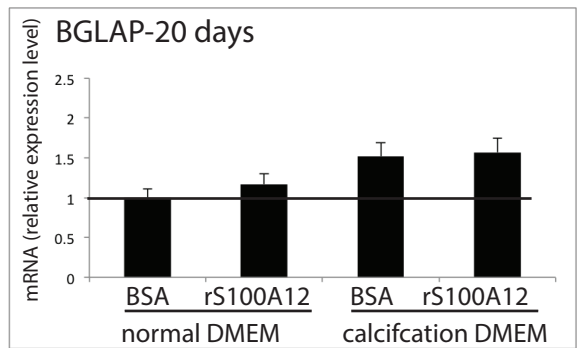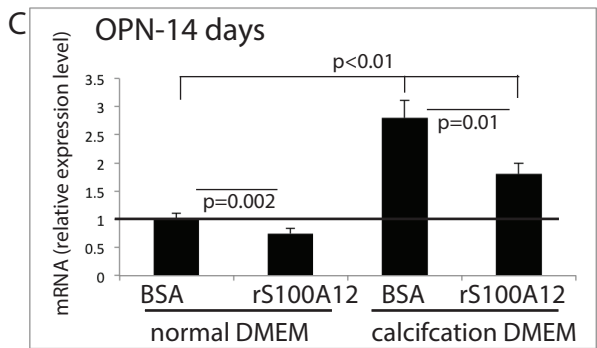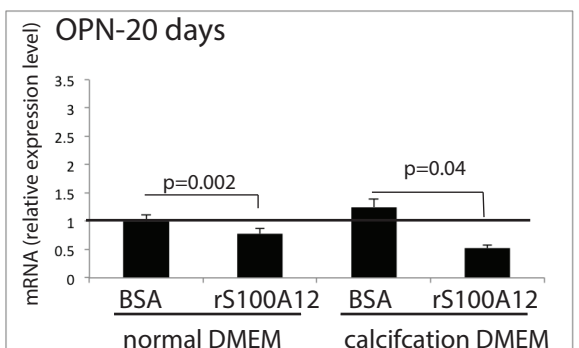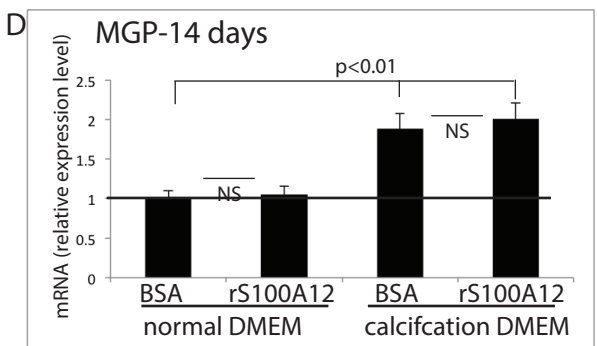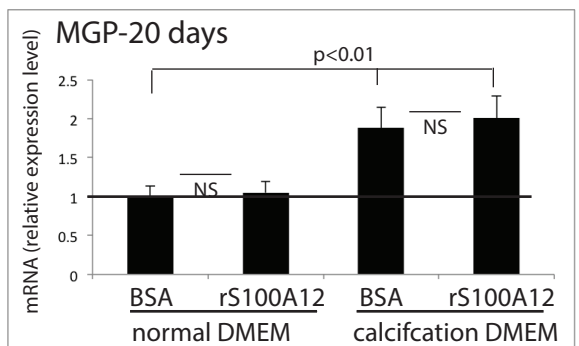

**Supplement Table I A.** Expression fold change of the top 50 genes up-regulated in blood cDNA of hBAC-S100 mice.

| <b>Gene Description</b>                                                                                  | <b>Gene Symbol</b>                         | <b>Fold Change</b> |
|----------------------------------------------------------------------------------------------------------|--------------------------------------------|--------------------|
| <b>lactotransferrin (Ltf)</b>                                                                            | Ltf                                        | 7.3305             |
| <b>neutrophilic granule protein (Ngp)</b>                                                                | Ngp                                        | 6.7347             |
| <b>cathelicidin antimicrobial peptide (Camp)</b>                                                         | Camp                                       | 6.2200             |
| <b>myeloperoxidase (Mpo)</b>                                                                             | Mpo                                        | 5.1112             |
| <b>proteinase 3 (Prtn3)</b>                                                                              | Prtn3                                      | 3.6874             |
| <b>elastase 2, neutrophil (Ela2)</b>                                                                     | Ela2                                       | 3.2735             |
| <b>lipocalin 2 (Lcn2)</b>                                                                                | Lcn2                                       | 3.0721             |
| <b>chitinase 3-like 4 (Chi3l4)</b>                                                                       | Chi3l4                                     | 2.7760             |
| <b>chitinase 3-like 3 (Chi3l3)</b>                                                                       | Chi3l3                                     | 2.7506             |
| <b>proteoglycan 2, bone marrow (Prg2)</b>                                                                | Prg2                                       | 2.5456             |
| <b>CD177 antigen (Cd177)</b>                                                                             | Cd177                                      | 2.3458             |
| <b>cathepsin G (Ctsg)</b>                                                                                | Ctsg                                       | 2.2901             |
|                                                                                                          | F830002E14Rik                              | 2.0120             |
| <b>protease, serine, 34 (Prss34)</b>                                                                     | Prss34                                     | 1.9825             |
| <b>ficolin A (Fcna)</b>                                                                                  | Fcna                                       | 1.9210             |
| <b>histone cluster 1, H2an (Hist1h2an)</b>                                                               | Hist1h2an                                  | 1.8723             |
| <b>erythroid associated factor (Eraf)</b>                                                                | Eraf                                       | 1.8451             |
| <b>histone cluster 1, H2ak (Hist1h2ak)</b>                                                               | Hist1h2ak                                  | 1.8247             |
| <b>histone cluster 1, H2ao (Hist1h2ao)</b>                                                               | Hist1h2ao                                  | 1.8082             |
| <b>histone cluster 1, H2ad (Hist1h2ad)</b>                                                               | Hist1h2ad                                  | 1.8075             |
| <b>carbonic anhydrase 1 (Car1), transcript variant 1</b>                                                 | Car1                                       | 1.7330             |
| <b>PREDICTED: similar to monoclonal anti-alpha-1,3-galactosyltransferase IgM heavy chain (LOC674110)</b> | LOC674110                                  | 1.7165             |
| <b>metallothionein 1 (Mt1)</b>                                                                           | Mt1                                        | 1.7108             |
| <b>annexin A3 (Anxa3)</b>                                                                                | Anxa3                                      | 1.6924             |
| <b>interferon induced transmembrane protein 6 (Ifitm6)</b>                                               | Ifitm6                                     | 1.6730             |
| <b>similar to Immunoglobulin heavy chain (LOC100043991)</b>                                              | LOC100043991                               | 1.6685             |
| <b>ficolin B (Fcnb)</b>                                                                                  | Fcnb                                       | 1.6490             |
|                                                                                                          | IGHV10S3_AF064446_Ig_heavy_variable_10S3_9 | 1.6306             |
| <b>complement component 1, q subcomponent, beta polypeptide (C1qb)</b>                                   | C1qb                                       | 1.6247             |
| <b>complement component 3 (C3)</b>                                                                       | C3                                         | 1.6137             |
| <b>chitinase 3-like 1 (Chi3l1)</b>                                                                       | Chi3l1                                     | 1.5927             |

|                                                                                           |                                                     |        |
|-------------------------------------------------------------------------------------------|-----------------------------------------------------|--------|
| <b>ADP-dependent glucokinase (Adpgk)</b>                                                  | Adpgk                                               | 1.5862 |
| <b>splicing factor, arginine/serine-rich 5 (SRp40, HRS) (Sfrs5), transcript variant 2</b> | Sfrs5                                               | 1.5759 |
| <b>myosin, light polypeptide 4 (Myl4)</b>                                                 | Myl4                                                | 1.5524 |
| <b>integrin beta 2-like (Itgb2l)</b>                                                      | Itgb2l                                              | 1.5510 |
| <b>glycophorin A (Gypa)</b>                                                               | Gypa                                                | 1.5498 |
| <b>olfactomedin-like 2B (Olfml2b)</b>                                                     | Olfml2b                                             | 1.5393 |
| <b>similar to high mobility group nucleosomal binding domain 2 (LOC100042405)</b>         | LOC100042405                                        | 1.5392 |
| <b>histone cluster 1, H2ah (Hist1h2ah)</b>                                                | Hist1h2ah                                           | 1.5327 |
| <b>RIKEN cDNA 6430706D22 gene (6430706D22Rik)</b>                                         | 6430706D22Rik                                       | 1.5305 |
| <b>high mobility group nucleosomal binding domain 2 (Hmgn2)</b>                           | Hmgn2                                               | 1.5299 |
|                                                                                           | IGKV4-<br>53_AJ231231_Ig_kappa_v<br>ariable_4-53_12 | 1.5241 |
| <b>similar to immunoglobulin light chain variable region (LOC232067)</b>                  | LOC232067                                           | 1.5100 |
| <b>similar to Hmgn2 protein (LOC100047827)</b>                                            | LOC100047827                                        | 1.5014 |
| <b>CCAAT/enhancer binding protein (C/EBP), epsilon (Cebpe)</b>                            | Cebpe                                               | 1.4976 |
| <b>solute carrier family 4 (anion exchanger), member 1 (Slc4a1)</b>                       | Slc4a1                                              | 1.4761 |
|                                                                                           | 5930418K15Rik                                       | 1.4759 |
| <b>pre-B lymphocyte gene 1 (Vpreb1)</b>                                                   | Vpreb1                                              | 1.4660 |
| <b>similar to Ig heavy chain V-III region VH26 precursor (LOC637337)</b>                  | LOC637337                                           | 1.4621 |
| <b>complement component 1, q subcomponent, C chain (C1qc)</b>                             | C1qc                                                | 1.4571 |

Values were obtained after clustering analysis on microarray performed in blood cDNA of WT and hBAC-S100 mice. n = 3 samples/group. Values are expressed as fold change compared to the WT control value. Genes were selected based on a *P* value threshold of 0.05.

**Supplement Table I B.** Expression fold change of selected up-regulated genes confirmed by RT-PCR in blood cDNA of hBAC-S100 mice.

| <b>Gene Description</b>                                        | <b>Gene Symbol</b> | <b>Microarray Fold Change</b> | <b>RT-PCR Fold Change</b> |
|----------------------------------------------------------------|--------------------|-------------------------------|---------------------------|
| <b>lactotransferrin (Ltf)</b>                                  | Ltf                | 7.3305                        | 20.8767                   |
| <b>myeloperoxidase (Mpo)</b>                                   | Mpo                | 5.1112                        | 31.8178                   |
| <b>proteinase 3 (Prtn3)</b>                                    | Prtn3              | 3.6874                        | 44.1915                   |
| <b>lipocalin 2 (Lcn2)</b>                                      | Lcn2               | 3.0721                        | 4.4896                    |
| <b>chitinase 3-like 3 (Chi3l3)</b>                             | Chi3l3             | 2.7506                        | 4.6739                    |
| <b>proteoglycan 2, bone marrow (Prg2)</b>                      | Prg2               | 2.5456                        | 22.5033                   |
| <b>CD177 antigen (Cd177)</b>                                   | Cd177              | 2.3458                        | 3.8180                    |
| <b>cathepsin G (Ctsg)</b>                                      | Ctsg               | 2.2901                        | 24.4727                   |
| <b>carbonic anhydrase 1 (Car1), transcript variant 1</b>       | Car1               | 1.7330                        | 7.4500                    |
| <b>CCAAT/enhancer binding protein (C/EBP), epsilon (Cebpe)</b> | Cebpe              | 1.4976                        | 6.4035                    |
| <b>vascular cell adhesion molecule 1 (Vcam1)</b>               | Vcam1              | 1.3354                        | 22.4915                   |
| <b>lipopolysaccharide binding protein (Lbp)</b>                | Lbp                | 1.1382                        | 5.0199                    |

Values are expressed as fold change compared to the WT value. n = 3 samples/group. Comparisons were performed using Student T test.  $P < 0.05$  vs WT.

**Supplement Table I C.** Expression fold change of the top 50 genes down-regulated in blood cDNA of hBAC-S100 mice.

| <b>Gene Description</b>                                                            | <b>Gene Symbol</b>                                    | <b>Fold Change</b> |
|------------------------------------------------------------------------------------|-------------------------------------------------------|--------------------|
|                                                                                    | IGHV1S135_AF304556_Ig_heavy_v<br>ariable_1S135_43     | 0.2623             |
| <b>immunoglobulin kappa variable 4-50 (LOC381782)</b>                              | LOC381782                                             | 0.3271             |
|                                                                                    | LOC384415                                             | 0.4140             |
| <b>hypothetical protein LOC673501 (LOC673501)</b>                                  | LOC673501                                             | 0.5009             |
|                                                                                    | IGHV1S30_X02462_Ig_heavy_varia<br>ble_1S30_12         | 0.5100             |
| <b>dual specificity phosphatase 1 (Dusp1)</b>                                      | Dusp1                                                 | 0.5296             |
| <b>similar to monoclonal antibody 17-1A, light chain (LOC100047132)</b>            | LOC100047132                                          | 0.5498             |
| <b>similar to Ig H-chain V-JH1-region (LOC100048770)</b>                           | LOC100048770                                          | 0.5569             |
|                                                                                    | IGKV2-<br>137_AJ231263_Ig_kappa_variable_<br>2-137_15 | 0.5701             |
| <b>similar to Ig kappa V-region 24B (LOC100046496)</b>                             | LOC100046496                                          | 0.5703             |
| <b>similar to Igh-VJ558 protein (LOC380799)</b>                                    | LOC380799                                             | 0.6111             |
| <b>DNA segment, Chr 6, Massachusetts Institute of Technology 97 (D6Mit97)</b>      | D6Mit97                                               | 0.6167             |
| <b>serine (or cysteine) peptidase inhibitor, clade B, member 6a (Serpib6a)</b>     | Serpib6a                                              | 0.6198             |
|                                                                                    | IGHV5S18_AF290972_Ig_heavy_va<br>riable_5S18_125      | 0.6227             |
| <b>Immunoglobulin heavy chain (gamma polypeptide), transcript variant 1 (Ighg)</b> | Ighg                                                  | 0.6245             |
| <b>RIKEN cDNA 2410146L05 gene (2410146L05Rik)</b>                                  | 2410146L05Rik                                         | 0.6328             |
| <b>hypothetical LOC385068</b>                                                      | LOC385068                                             | 0.6449             |
| <b>E26 avian leukemia oncogene 2, 3' domain (Ets2)</b>                             | Ets2                                                  | 0.6468             |
| <b>RIKEN cDNA 4930486L24 gene (4930486L24Rik)</b>                                  | 4930486L24Rik                                         | 0.6491             |
| <b>arginase type II (Arg2)</b>                                                     | Arg2                                                  | 0.6507             |
| <b>similar to Ig heavy chain V region 1B43 precursor (LOC630337)</b>               | LOC630337                                             | 0.6514             |
| <b>RIKEN cDNA 1700081H05 gene</b>                                                  | 1700081H05Rik                                         | 0.6588             |
| <b>RAS related protein 2a (Rap2a)</b>                                              | Rap2a                                                 | 0.6840             |
| <b>coagulation factor XIII, A1 subunit (F13a1)</b>                                 | F13a1                                                 | 0.6882             |
| <b>arrestin domain containing 3 (Arrdc3)</b>                                       | Arrdc3                                                | 0.6901             |
| <b>C-type lectin domain family 7, member a</b>                                     | Clecsf12                                              | 0.6922             |

|                                                                                  |                                            |        |
|----------------------------------------------------------------------------------|--------------------------------------------|--------|
| <b>leucine rich repeat protein 3, neuronal (Lrrn3)</b>                           | Lrrn3                                      | 0.6938 |
| <b>RIKEN cDNA 2210039O17 gene</b>                                                | 2210039O17Rik                              | 0.6945 |
|                                                                                  | scl0015365.1_6                             | 0.6966 |
| <b>cDNA sequence AK157302 (AK157302)</b>                                         | AK157302                                   | 0.6978 |
| <b>DnaJ (Hsp40) homolog, subfamily B, member 1 (Dnajb1)</b>                      | Dnajb1                                     | 0.6979 |
|                                                                                  | E430033B07Rik                              | 0.6986 |
| <b>period homolog 1 (Drosophila) (Per1)</b>                                      | Per1                                       | 0.6991 |
| <b>aspartic peptidase, retroviral-like 1 (Asprv1)</b>                            | Asprv1                                     | 0.6997 |
| <b>similar to Ig kappa chain V-V region MPC11 precursor (LOC637227)</b>          | LOC637227                                  | 0.7002 |
| <b>predicted gene, OTTMUSG00000000971 (OTTMUSG00000000971)</b>                   | OTTMUSG00000000971                         | 0.7003 |
| <b>LSM12 homolog (S. cerevisiae)</b>                                             | 2600001B17Rik                              | 0.7022 |
| <b>RIKEN cDNA 4732429D16 gene (4732429D16Rik)</b>                                | 4732429D16Rik                              | 0.7024 |
| <b>G protein-coupled receptor 109A (Gpr109a)</b>                                 | Gpr109a                                    | 0.7036 |
| <b>potassium voltage gated channel, Shaw-related subfamily, member 4 (Kcnc4)</b> | Kcnc4                                      | 0.7076 |
| <b>similar to integrin-linked kinase ILK (LOC621824), misc RNA.</b>              | LOC621824                                  | 0.7081 |
| <b>RAS-related C3 botulinum substrate 1 (Rac1)</b>                               | Rac1                                       | 0.7086 |
| <b>similar to idiotypic anti-NP IgG(1) heavy chain V-D-J (LOC544904)</b>         | LOC544904                                  | 0.7119 |
| <b>similar to idiotypic anti-NP IgG(1) heavy chain V-D-J (LOC380805)</b>         | LOC380805                                  | 0.7147 |
|                                                                                  | IGKV8-31_AJ235957_Ig_kappa_variable_8-31_3 | 0.7160 |
| <b>similar to Ig H chain V region (clone 1E10) (LOC630305), misc RNA.</b>        | LOC630305                                  | 0.7160 |
| <b>solute carrier family 44, member 1 (Slc44a1)</b>                              | Slc44a1                                    | 0.7177 |
| <b>C-type lectin domain family 4, member g (Clec4g)</b>                          | Clec4g                                     | 0.7188 |
| <b>Chemokine (C-C motif) ligand 6 (Ccl6)</b>                                     | Ccl6                                       | 0.7192 |
| <b>similar to LRRGT00183 (LOC619973)</b>                                         | LOC619973                                  | 0.7199 |

Values were obtained after clustering analysis on microarray performed in blood cDNA of WT and hBAC-S100 mice. n = 3 samples/group. Values are expressed as fold change compared to the WT control value. Genes were selected based on a *P* value threshold of 0.05.
